# Supplementary material for: Clinical outcomes in a subpopulation of adults with Morquio A syndrome: results from a long-term extension study of elosulfase alfa
Source: Springer Nature journal article supplement (doi:10.1186/s13023-017-0634-0), 2017-05-23
Supplement: MOESM1 [file 12309990]

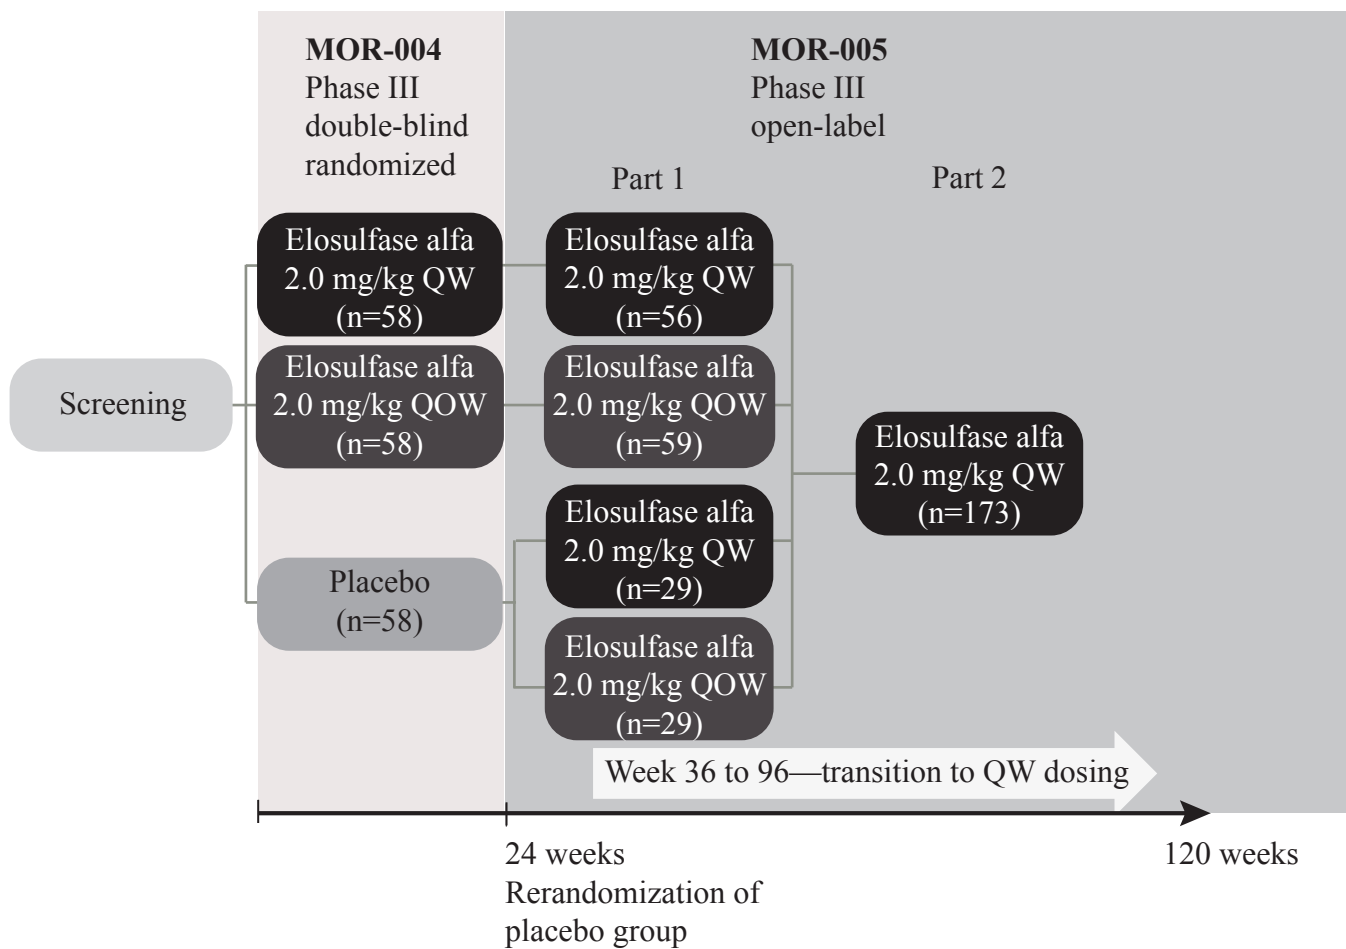

**Fig. S1 Study design.** After completion of MOR-004, patients initially randomized to 2.0 mg/kg/week (QW-QW cohort) or 2.0 mg/kg every other week (QOW-QOW cohort) remained on their assigned dosing regimen. Patients taking placebo were randomized to one of the two dosing regimens (PBO-QOW or PBO-QW cohort, respectively). After a review of efficacy and safety results from MOR-004 established the recommended dose for part 2, all patients were switched to 2.0 mg/kg QW. Specific week of transition ranged from week 36 to 96, depending on enrollment timing.
