# Supplementary material for: Clinical outcomes in a subpopulation of adults with Morquio A syndrome: results from a long-term extension study of elosulfase alfa
Source: Springer Nature journal article supplement (doi:10.1186/s13023-017-0634-0), 2017-05-23
Supplement: MOESM2 [file 12309990]

**Table S1.** Descriptive statistics on change from baseline to year 2 (MorCAP) or week 120 (MOR-005).

| <b>Measure</b>                                             | <b>Study</b> | <b>Analysis</b> | <b>N</b> | <b>Mean change</b> | <b>SE</b> |
|------------------------------------------------------------|--------------|-----------------|----------|--------------------|-----------|
| <b>6MWT, m</b>                                             | MorCAP       | ITT             | 9        | 4.3                | 10.5      |
|                                                            | MOR-005      | ITT             | 33       | 29.6               | 13.8      |
|                                                            |              | MPP             | 30       | 34.1               | 14.7      |
| <b>3MSCT, stairs/min</b>                                   | MorCAP       | ITT             | 9        | 3.4                | 5.2       |
|                                                            | MOR-005      | ITT             | 33       | 5.8                | 2.0       |
|                                                            |              | MPP             | 30       | 6.6                | 2.1       |
| <b>uKS , <math>\mu\text{g}/\text{mg}^{\text{a}}</math></b> | MorCAP       | ITT             | 4        | 3.0                | 1.9       |
|                                                            | MOR-005      | ITT             | 30       | -6.4               | 0.9       |
|                                                            |              | MPP             | 27       | -6.6               | 0.9       |
| <b>uKS , % change<sup>a</sup></b>                          | MorCAP       | ITT             | 4        | 72.3               | 37.3      |
|                                                            | MOR-005      | ITT             | 30       | -65.4              | 2.2       |
|                                                            |              | MPP             | 27       | -66.0              | 2.4       |
| <b>FVC, L</b>                                              | MorCAP       | ITT             | 9        | -0.002             | 0.05      |
|                                                            | MOR-005      | ITT             | 31       | 0.0                | 0.04      |
|                                                            |              | MPP             | 28       | 0.0                | 0.04      |
| <b>FVC % change</b>                                        | MorCAP       | ITT             | 9        | -2.0               | 3.3       |
|                                                            | MOR-005      | ITT             | 31       | -2.6               | 2.7       |
|                                                            |              | MPP             | 28       | -0.7               | 2.8       |
| <b>FEV<sub>1</sub>, L</b>                                  | MorCAP       | ITT             | 9        | -0.039             | 0.047     |
|                                                            | MOR-005      | ITT             | 32       | 0.0                | 0.04      |
|                                                            |              | MPP             | 29       | 0.0                | 0.02      |
| <b>FEV<sub>1</sub> % change</b>                            | MorCAP       | ITT             | 9        | -4.2               | 3.8       |
|                                                            | MOR-005      | ITT             | 32       | -1.9               | 2.9       |
|                                                            |              | MPP             | 29       | 0.5                | 2.8       |
| <b>MVV, L/min</b>                                          | MorCAP       | ITT             | 7        | -1.40              | 3.8       |
|                                                            | MOR-005      | ITT             | 30       | 0.9                | 2.2       |
|                                                            |              | MPP             | 27       | 1.7                | 2.3       |
| <b>MVV % change</b>                                        | MorCAP       | ITT             | 7        | -1.9               | 7.7       |
|                                                            | MOR-005      | ITT             | 30       | 1.7                | 4.5       |
|                                                            |              | MPP             | 27       | 3.7                | 4.6       |
| <b>Self-care</b>                                           | MorCAP       | ITT             | 10       | 0.5                | 0.5       |
|                                                            | MOR-005      | ITT             | 33       | -0.4               | 0.2       |
|                                                            |              | MPP             | 30       | -0.6               | 0.2       |
| <b>Caregiver assistance change</b>                         | MorCAP       | ITT             | 10       | 0.4                | 2.3       |
|                                                            | MOR-005      | ITT             | 33       | -1.2               | 1.1       |
|                                                            |              | MPP             | 30       | -1.3               | 1.2       |
| <b>Mobility change</b>                                     | MorCAP       | ITT             | 10       | -0.3               | 1.0       |
|                                                            | MOR-005      | ITT             | 33       | -0.8               | 0.3       |
|                                                            |              | MPP             | 30       | -0.8               | 0.3       |

3MSCT, 3-minute stair climb test; 6MWT, 6-minute walk test; FEV<sub>1</sub>, forced expiratory volume in 1 second; FVC, forced vital capacity; HAQ, Health Assessment Questionnaire; ITT, intent to treat; MPP, modified per-protocol; MVV, maximal voluntary ventilation; uKS, urinary keratan sulfate.

<sup>a</sup>Normalized uKS is calculated as uKS divided by urine creatinine.
