# Supplementary material for: Clinical outcomes in a subpopulation of adults with Morquio A syndrome: results from a long-term extension study of elosulfase alfa
Source: Springer Nature journal article supplement (doi:10.1186/s13023-017-0634-0), 2017-05-23
Supplement: MOESM3 [file 12309990]

**Table S2.** Descriptive statistics on change from baseline to year 2 (MOR-001) or week 120 (MOR-005) by dosing cohort.

| Measure                               | Analysis | Parameter | MOR-001           | MOR-005           |                  |                   |                   |
|---------------------------------------|----------|-----------|-------------------|-------------------|------------------|-------------------|-------------------|
|                                       |          |           |                   | PBO-QOW           | PBO-QW           | QOW-QOW           | QW-QW             |
| 6MWT<br>change, m                     | ITT      | N         | 9                 | 7                 | 6                | 10                | 10                |
|                                       |          | Mean (SE) | 4.3 (10.5)        | 34.2 (23.9)       | 51.3 (20.8)      | -11.4 (37.8)      | 54.4 (9.9)        |
|                                       | MPP      | N         |                   | 5                 | 6                | 10                | 9                 |
|                                       |          | Mean (SE) |                   | 62.1 (20.1)       | 51.3 (20.8)      | -11.4 (37.8)      | 57.6 (10.5)       |
| 3MSCT,<br>stairs/min                  | ITT      | N         | 9                 | 7                 | 6                | 10                | 10                |
|                                       |          | Mean (SE) | 3.4 (5.2)         | 2.1 (1.8)         | 8.2 (6.2)        | 7.4 (4)           | 5.3 (3.6)         |
|                                       | MPP      | N         |                   | 5                 | 6                | 10                | 9                 |
|                                       |          | Mean (SE) |                   | 4.2 (1.6)         | 8.2 (6.2)        | 7.4 (4)           | 6.2 (3.9)         |
| uKS,<br>µg/mg <sup>a</sup>            | ITT      | N         | 4                 | 7                 | 4                | 9                 | 10                |
|                                       |          | Mean (SE) | 3.0 (1.9)         | -3.7 (0.8)        | -8.4 (2.7)       | -4.6 (0.9)        | -9.2 (1.9)        |
|                                       | MPP      | N         |                   | 5                 | 4                | 9                 | 9                 |
|                                       |          | Mean (SE) |                   | -3.8 (1.1)        | -8.4 (2.7)       | -4.6 (0.9)        | -9.2 (2.1)        |
| uKS, %<br>change                      | ITT      | N         | 4                 | 7                 | 4                | 9                 | 10                |
|                                       |          | Mean (SE) | 72.3 (37.3)       | -64.3 (4.6)       | -64.4 (5)        | -62.6 (4.1)       | -69 (4.1)         |
|                                       | MPP      | N         |                   | 5                 | 4                | 9                 | 9                 |
|                                       |          | Mean (SE) |                   | -66.9 (6.1)       | -64.4 (5.0)      | -62.6 (4.1)       | -69.6 (4.6)       |
| FVC, L                                | ITT      | N         | 9                 | 8                 | 6                | 10                | 7                 |
|                                       |          | Mean (SE) | -0.002<br>(0.05)  | -0.106<br>(0.07)  | -0.042<br>(0.05) | 0.024 (0.06)      | -0.024<br>(0.11)  |
|                                       | MPP      | N         |                   | 6                 | 6                | 10                | 6                 |
|                                       |          | Mean (SE) |                   | -0.032<br>(0.07)  | -0.042<br>(0.05) | 0.024 (0.06)      | -0.013<br>(0.13)  |
| FVC, %<br>change                      | ITT      | N         | 9                 | 8                 | 6                | 10                | 7                 |
|                                       |          | Mean (SE) | -2.0 (3.3)        | -4.4 (4.5)        | 1.1 (6.0)        | 1.2 (4.3)         | -9.1 (7.6)        |
|                                       | MPP      | N         |                   | 6                 | 6                | 10                | 6                 |
|                                       |          | Mean (SE) |                   | 1.2 (3.4)         | 1.1 (6.0)        | 1.2 (4.3)         | -7.4 (8.8)        |
| FEV <sub>1</sub> , L                  | ITT      | N         | 9                 | 8                 | 6                | 10                | 8                 |
|                                       |          | Mean (SE) | -0.039<br>(0.047) | -0.119<br>(0.072) | 0.063<br>(0.024) | -0.044<br>(0.022) | -0.015<br>(0.075) |
|                                       | MPP      | N         |                   | 6                 | 6                | 10                | 7                 |
|                                       |          | Mean (SE) |                   | -0.032<br>(0.058) | 0.063<br>(0.024) | -0.044<br>(0.022) | -0.007<br>(0.086) |
| FEV <sub>1</sub> , %<br>change        | ITT      | N         | 9                 | 8                 | 6                | 10                | 8                 |
|                                       |          | Mean (SE) | -4.2 (3.8)        | -6.7 (3.2)        | 9.0 (3.6)        | -3.6 (3.4)        | 3.3 (9.8)         |
|                                       | MPP      | N         |                   | 6                 | 6                | 10                | 7                 |
|                                       |          | Mean (SE) |                   | 0.9 (3.2)         | 9.0 (3.6)        | -3.6 (3.4)        | -1.3 (9.8)        |
| MVV, L                                | ITT      | N         | 7                 | 8                 | 5                | 10                | 7                 |
|                                       |          | Mean (SE) | -1.40<br>(3.8)    | -5.43 (5.6)       | 6.89 (7.4)       | 2.77 (2.9)        | 1.2 (1.4)         |
|                                       | MPP      | N         |                   | 6                 | 5                | 10                | 6                 |
|                                       |          | Mean (SE) |                   | -3.81 (7.2)       | 6.89 (7.4)       | 2.77 (2.9)        | 1.08 (1.6)        |
| MVV, %<br>change                      | ITT      | N         | 7                 | 8                 | 5                | 10                | 7                 |
|                                       |          | Mean (SE) | -1.9 (7.7)        | -1.1 (10.7)       | 3.3 (14.9)       | 1.6 (6)           | 4.1 (8.9)         |
|                                       | MPP      | N         |                   | 6                 | 5                | 10                | 6                 |
|                                       |          | Mean (SE) |                   | 7.9 (10.9)        | 3.3 (14.9)       | 1.6 (6.0)         | 3.3 (10.5)        |
| HAQ—<br>self-care<br>domain<br>change | ITT      | N         | 10                | 8                 | 5                | 10                | 10                |
|                                       |          | Mean (SE) | 0.5 (0.5)         | -0.1 (0.5)        | -0.8 (0.6)       | -0.6 (0.3)        | -0.4 (0.3)        |
|                                       | MPP      | N         |                   | 6                 | 5                | 10                | 9                 |
|                                       |          | Mean (SE) |                   | -0.5 (0.4)        | -0.8 (0.6)       | -0.6 (0.3)        | -0.5 (0.4)        |
| HAQ—<br>caregiver<br>assistance       | ITT      | N         | 10                | 8                 | 5                | 10                | 10                |
|                                       |          | Mean (SE) | 0.4 (2.3)         | -2.4 (2.5)        | -0.2 (2.0)       | -1.6 (2.3)        | -0.2 (1.7)        |
|                                       | MPP      | N         |                   | 6                 | 5                | 10                | 9                 |
|                                       |          | Mean (SE) |                   | -2.5 (3.4)        | -0.2 (2)         | -1.6 (2.3)        | -0.9 (1.7)        |
| HAQ—<br>mobility<br>change            | ITT      | N         | 10                | 8                 | 5                | 10                | 10                |
|                                       |          | Mean (SE) | -0.3 (1.0)        | -0.8 (0.4)        | -1.6 (1.4)       | -0.7 (0.4)        | -0.4 (0.5)        |
|                                       | MPP      | N         |                   | 6                 | 5                | 10                | 9                 |
|                                       |          | Mean (SE) |                   | -0.8 (0.4)        | -1.6 (1.4)       | -0.7 (0.4)        | -0.5 (0.6)        |

3MSCT, 3-minute stair climb test; 6MWT, 6-minute walk test; FEV<sub>1</sub>, forced expiratory volume in 1 second; FVC, forced vital capacity; HAQ, Health Assessment Questionnaire; ITT, intent to treat; MPP, modified per-protocol; MVV, maximal voluntary ventilation; uKS, urinary keratan sulfate

<sup>a</sup>Normalized uKS is calculated as urine keratan sulfate divided by urine creatinine
