# Supplementary material for: Clinical outcomes in a subpopulation of adults with Morquio A syndrome: results from a long-term extension study of elosulfase alfa
Source: Springer Nature journal article supplement (doi:10.1186/s13023-017-0634-0), 2017-05-23
Supplement: MOESM4 [file 12309990]

**Table S3.** LS mean change from baseline to year 2 (MorCAP) or week 120 (MOR-005) based on a repeated-measures ANCOVA model<sup>a</sup>.

| <b>Measure</b>                     | <b>Study</b> | <b>Analysis</b> | <b>N</b> | <b>LS mean change</b> | <b>SE</b> | <b>P value<sup>b</sup></b> |
|------------------------------------|--------------|-----------------|----------|-----------------------|-----------|----------------------------|
| <b>6MWT, m</b>                     | MorCAP       | ITT             | 9        | 6.5                   | 15.9      | .68                        |
|                                    | MOR-005      | ITT             | 33       | 30.5                  | 10.8      | .0064                      |
|                                    |              | MPP             | 30       | 34.9                  | 11.7      | .0042                      |
| <b>3MSCT, stairs/min</b>           | MorCAP       | ITT             | 9        | 4.0                   | 4.7       | .40                        |
|                                    | MOR-005      | ITT             | 33       | 5.9                   | 1.7       | .001                       |
|                                    |              | MPP             | 30       | 6.7                   | 1.8       | .0005                      |
| <b>uKS % change</b>                | MorCAP       | ITT             | 4        | 46.1                  | 58.1      | .43                        |
|                                    | MOR-005      | ITT             | 30       | -65.6                 | 2.4       | <.0001                     |
|                                    |              | MPP             | 27       | -66.3                 | 2.7       | <.0001                     |
| <b>FVC, L</b>                      | MorCAP       | ITT             | 9        | -0.017                | 0.04      | .66                        |
|                                    | MOR-005      | ITT             | 31       | -0.031                | 0.03      | .32                        |
|                                    |              | MPP             | 28       | -0.007                | 0.03      | .83                        |
| <b>FEV<sub>1</sub>, L</b>          | MorCAP       | ITT             | 9        | -0.042                | 0.05      | .42                        |
|                                    | MOR-005      | ITT             | 32       | -0.034                | 0.02      | .15                        |
|                                    |              | MPP             | 29       | -0.009                | 0.02      | .69                        |
| <b>MVV change, L/min</b>           | MorCAP       | ITT             | 7        | -0.86                 | 2.9       | .77                        |
|                                    | MOR-005      | ITT             | 30       | 0.90                  | 2.0       | .65                        |
|                                    |              | MPP             | 27       | 1.65                  | 2.2       | .45                        |
| <b>Caregiver assistance change</b> | MorCAP       | ITT             | 10       | 0.29                  | 1.3       | .82                        |
|                                    | MOR-005      | ITT             | 33       | -1.02                 | 0.9       | .26                        |
|                                    |              | MPP             | 30       | -1.24                 | 1.0       | .21                        |
| <b>Mobility change</b>             | MorCAP       | ITT             | 10       | -0.20                 | 0.5       | .69                        |
|                                    | MOR-005      | ITT             | 33       | -0.76                 | 0.2       | .002                       |
|                                    |              | MPP             | 30       | -0.81                 | 0.3       | .003                       |
| <b>Self-care</b>                   | MorCAP       | ITT             | 10       | 0.53                  | 0.3       | .071                       |
|                                    | MOR-005      | ITT             | 33       | -0.43                 | 0.2       | .010                       |
|                                    |              | MPP             | 30       | -0.58                 | 0.2       | .001                       |

3MSCT, 3-minute stair climb test; 6MWT, 6-minute walk test; ANCOVA, analysis of covariance; FEV<sub>1</sub>, forced expiratory volume in 1 second; FVC, forced vital capacity; ITT, intent to treat; LS, least squares; MPP, modified per-protocol; MVV, maximal voluntary ventilation; uKS, urinary keratan sulfate.

<sup>a</sup>For 6MWT, the model included baseline 6MWT category (< or ≥200 m), treatment, time point, and treatment and time point interaction. For all other assessments, baseline measurement replaced baseline 6MWT category, except for 3MSCT and uKS, which included both terms.

<sup>b</sup>P values were calculated for LS mean assessments at year 2 or week 120 vs baseline.
