# Supplementary material for: Clinical outcomes in a subpopulation of adults with Morquio A syndrome: results from a long-term extension study of elosulfase alfa
Source: Springer Nature journal article supplement (doi:10.1186/s13023-017-0634-0), 2017-05-23
Supplement: MOESM5 [file 12309990]

**Table S4.** Summary of adverse events.

| <b>Adverse event</b>                                                 | <b>ITT (N=173)</b> | <b>≥18 years ITT (N=37)</b> | <b>MPP (N=124)</b> | <b>≥18 years MPP (N=32)</b> |
|----------------------------------------------------------------------|--------------------|-----------------------------|--------------------|-----------------------------|
| <b>Any AE, n (%)</b>                                                 | 173 (100.0)        | 37 (100.0)                  | 124 (100.0)        | 32 (100.0)                  |
| <b>Grade 1</b>                                                       | 33 (19.1)          | 6 (16.2)                    | 29 (23.4)          | 6 (18.8)                    |
| <b>Grade 2</b>                                                       | 89 (51.4)          | 23 (62.2)                   | 66 (53.2)          | 21 (65.6)                   |
| <b>Grade 3</b>                                                       | 44 (25.4)          | 7 (18.9)                    | 27 (21.8)          | 4 (12.5)                    |
| <b>Grade 4</b>                                                       | 6 (3.5)            | 1 (2.7)                     | 2 (1.6)            | 1 (3.1)                     |
| <b>Grade 5</b>                                                       | 1 (0.6)            | 0                           | 0                  | 0                           |
| <b>Number of AEs per patient, mean/median</b>                        | 35.3/28.0          | 40.6/28.0                   | 36.0/28.5          | 39.7/28.5                   |
| <b>Any study drug–related AE, n (%)<sup>a</sup></b>                  | 128 (74.0)         | 27 (73.0)                   | 89 (71.8)          | 23 (71.9)                   |
| <b>Grade 1</b>                                                       | 64 (37.0)          | 13 (35.1)                   | 46 (37.1)          | 11 (34.4)                   |
| <b>Grade 2</b>                                                       | 60 (34.7)          | 14 (37.8)                   | 41 (33.1)          | 12 (37.5)                   |
| <b>Grade 3</b>                                                       | 3 (1.7)            | 0 (0.0)                     | 2 (1.6)            | 0 (0.0)                     |
| <b>Grade 4</b>                                                       | 1 (0.6)            | 0                           | 0                  | 0                           |
| <b>Any SAE, n (%)</b>                                                | 77 (44.5)          | 14 (37.8)                   | 35 (28.2)          | 9 (28.1)                    |
| <b>Grade 1</b>                                                       | 11 (6.4)           | 1 (2.7)                     | 5 (4.0)            | 1 (3.1)                     |
| <b>Grade 2</b>                                                       | 25 (14.5)          | 6 (16.2)                    | 11 (8.9)           | 4 (12.5)                    |
| <b>Grade 3</b>                                                       | 34 (19.7)          | 6 (16.2)                    | 17 (13.7)          | 3 (9.4)                     |
| <b>Grade 4</b>                                                       | 6 (3.5)            | 1 (2.7)                     | 2 (1.6)            | 1 (3.1)                     |
| <b>Grade 5</b>                                                       | 1 (0.6)            | 0 (0.0)                     | 2 (1.6)            | 0                           |
| <b>Number of SAEs per patient, mean/median</b>                       | 0.7/0.0            | 0.5/0.0                     | 0.4/0.0            | 0.4/0.0                     |
| <b>Any study drug–related SAE, n (%)<sup>a</sup></b>                 | 2 (1.2)            | 0                           | 1 (0.8)            | 0                           |
| <b>Grade 2</b>                                                       | 1 (0.6)            | 0                           | 1 (0.8)            | 0                           |
| <b>Grade 4</b>                                                       | 1 (0.6)            | 0                           | 0                  | 0                           |
| <b>Any AE leading to study discontinuation, n (%)</b>                | 3 (1.7)            | 0                           | 0                  | 0                           |
| <b>Grade 3</b>                                                       | 1 (0.6)            | 0                           | 0                  | 0                           |
| <b>Grade 4</b>                                                       | 1 (0.6)            | 0                           | 0                  | 0                           |
| <b>Grade 5</b>                                                       | 1 (0.6)            | 0                           | 0                  | 0                           |
| <b>Any AE leading to permanent study drug discontinuation, n (%)</b> | 4 (2.3)            | 1 (2.7)                     | 1 (0.8)            | 1 (3.1)                     |
| <b>Grade 3</b>                                                       | 2 (1.2)            | 1 (2.7)                     | 1 (0.8)            | 1 (3.1)                     |
| <b>Grade 4</b>                                                       | 1 (0.6)            | 0                           | 0                  | 0                           |
| <b>Grade 5</b>                                                       | 1 (0.6)            | 0                           | 0                  | 0                           |
| <b>Death</b>                                                         | 1 (0.6)            | 0                           | 0                  | 0                           |

SAE, serious adverse event.
